# Supplementary material for: Influence of albumin concentration on surface characteristics and cellular responses in the pre-incubation of multi-walled carbon nanotubes
Source: Royal Society of Chemistry journal article supplement (doi:10.1039/d4na00743c), 2024-01-01
Supplement: d4na00743c1.pdf [file d4na00743c1.pdf]

## Supplementary Information

### **Influence of Albumin Concentration on Surface Characteristics and Cellular Responses in the Pre-Incubation of Multi-Walled Carbon Nanotubes**

Sun Young Lee<sup>a,†</sup>, Jae-won Choi<sup>a,b,†</sup>, Tae Geol Lee<sup>a,\*</sup>, Min Beom Heo<sup>a,\*</sup>, Jin Gyeong Son<sup>a,\*</sup>

<sup>a</sup>Bioimaging team, Safety Measurement Institute, Korea Research Institute of Standards and Science,  
267 Gajeong-ro, Yuseong-gu, Daejeon 34113, Republic of Korea

<sup>b</sup>Department of Biomedical Science and Technology, Graduate School, Kyung Hee University, Seoul  
02447, Republic of Korea

†These authors equally contributed to this article

\*Corresponding Author: Tae Geol Lee, [tglee@kriss.re.kr](mailto:tglee@kriss.re.kr); Min Beom Heo, [mbheo@kriss.re.kr](mailto:mbheo@kriss.re.kr); Jin Gyeong Son, [yeskyoung@kriss.re.kr](mailto:yeskyoung@kriss.re.kr)

Figure S1–S4

Table S1

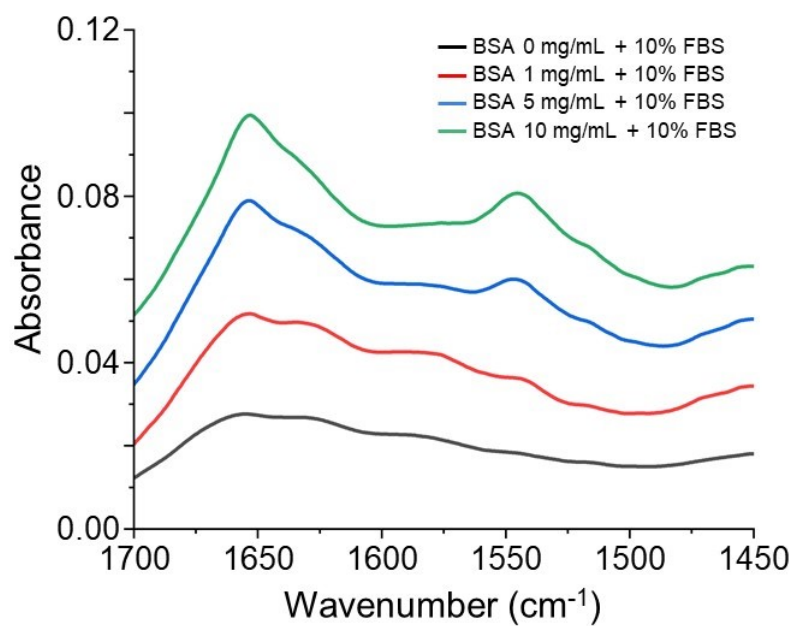

**Supplementary Fig. S1.** Fourier-transform infrared (FT-IR) absorption spectra of multi-walled carbon nanotubes (MWCNTs) pre-incubated with bovine serum albumin (BSA) at 0 mg/mL, 1 mg/mL, 5 mg/mL, and 10 mg/mL.

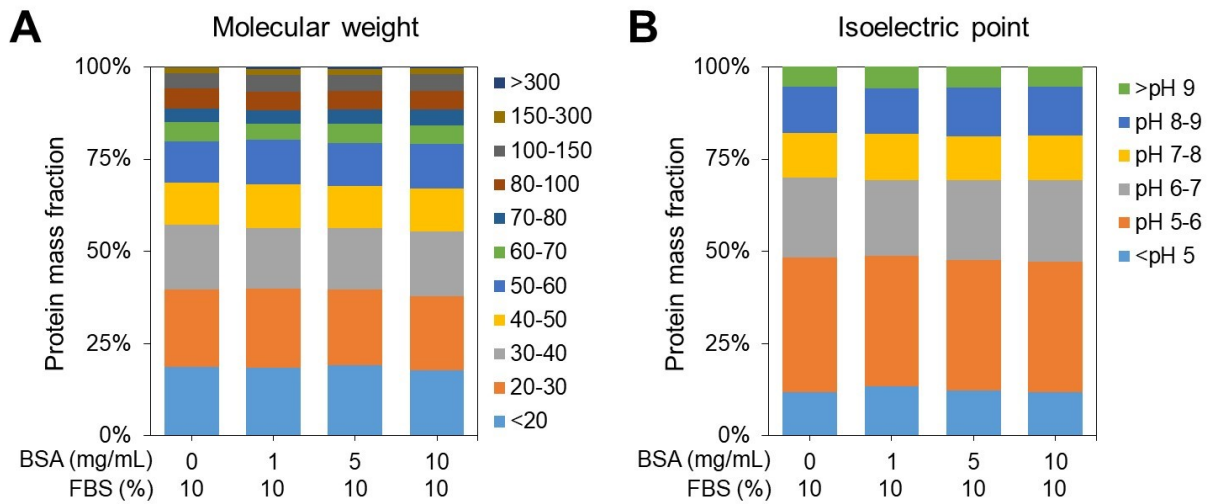

**Supplementary Fig. S2.** (A) Molecular weight and (B) isoelectric point distribution of total proteins identified in the protein coronas adsorbed on BSA-coated MWCNTs at four different BSA concentrations.

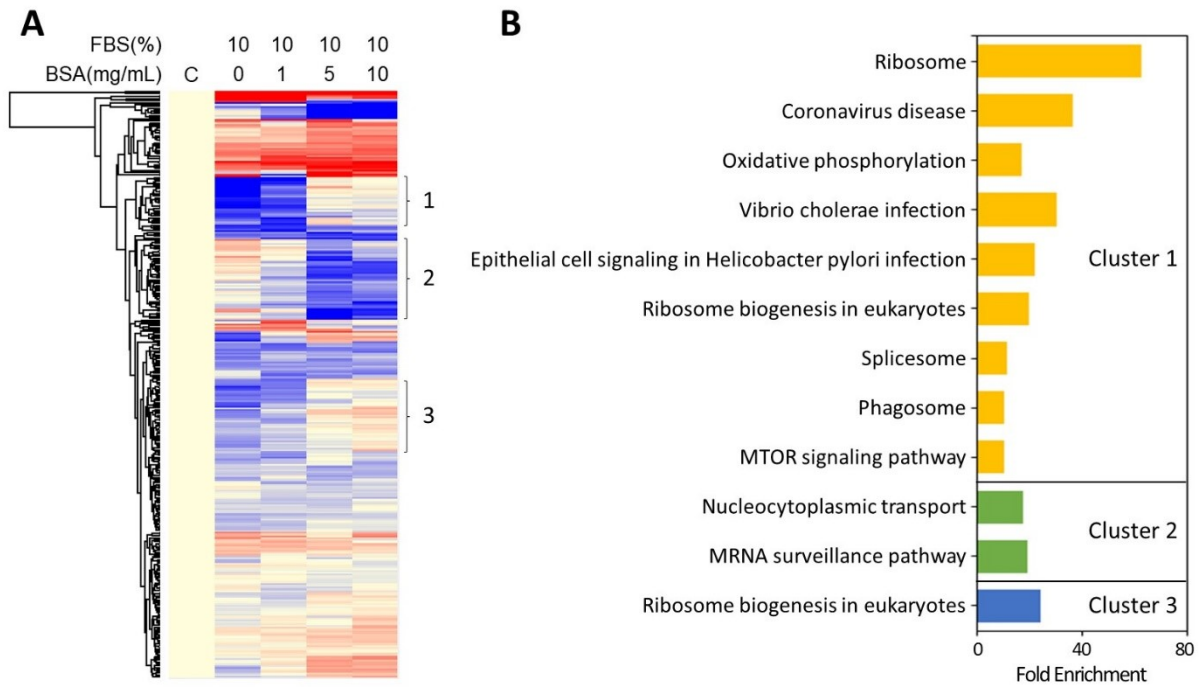

**Supplementary Fig. S3.** Clustering analysis. (A) Heatmap of differentially expressed proteins in A549 cells treated with BSA-coated MWCNTs at four BSA concentrations. The colors represent protein upregulation (red) or downregulation (blue) at each BSA concentration. (B) KEGG pathways of differentially expressed proteins included in cluster 1, 2, and 3 determined from the heatmap. The vertical axis shows the significantly enriched biological processes, and the horizontal axis represents the fold enrichment corresponding to the biological processes. Fold enrichment indicates the percentage of proteins divided by all proteins within a certain gene ontology term.

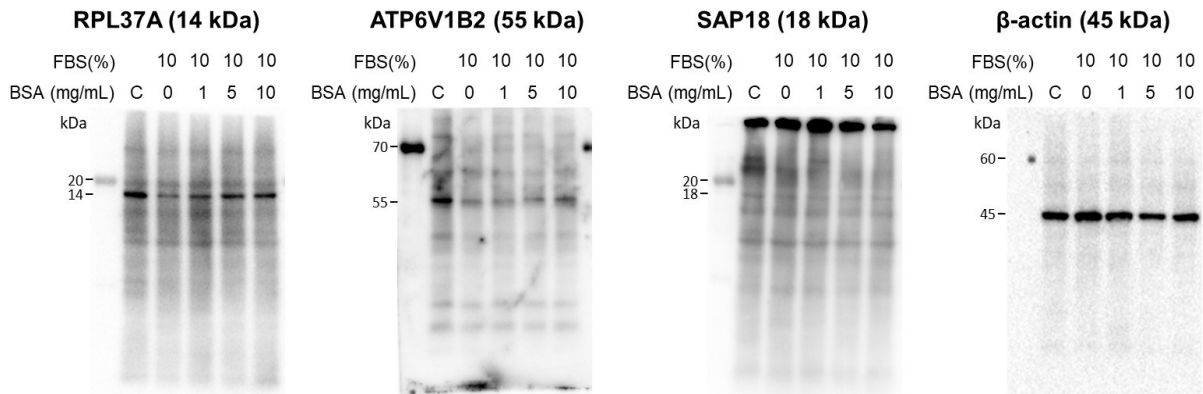

**Supplementary Fig. S4.** Full-length blots corresponding to Fig. 7B in the main text. Abbreviations: RPL37A, 60S ribosomal protein L37a; ATP6V1B2, V-type proton ATPase subunit B brain isoform; SAP18, histone deacetylase complex subunit SAP18.

**Supplementary Table S1.** List of identified proteins in the PCs adsorbed on BSA-coated MWCNTs according to their physiological functions corresponding to Fig. 4 in the main text.

| Accession           | Symbol | Description                                  |
|---------------------|--------|----------------------------------------------|
| <i>Acute phase</i>  |        |                                              |
| Q3T052              | ITIH4  | Inter-alpha-trypsin inhibitor heavy chain H4 |
| Q32L76              | SAA4   | Serum amyloid A-4 protein                    |
| P35541              | SAA    | Serum amyloid A protein                      |
| P28800              | A2AP   | Alpha-2-antiplasmin                          |
| P07589              | FN1    | Fibronectin                                  |
| P00735              | THRB   | Prothrombin                                  |
| <i>Complement</i>   |        |                                              |
| P01030              | CO4    | Complement C4 (Fragments)                    |
| P12082              | CO5    | Complement C5a anaphylatoxin                 |
| P81187              | CFAB   | Complement factor B                          |
| Q0VXC1              | C1S    | Complement C1s subcomponent                  |
| Q28065              | C4BPA  | C4b-binding protein alpha chain              |
| Q28085              | CFAH   | Complement factor H                          |
| Q29RQ1              | CO7    | Complement component C7                      |
| Q29RU4              | CO6    | Complement component C6                      |
| Q2KIV9              | C1QB   | Complement C1q subcomponent subunit B        |
| Q2UVX4              | CO3    | Complement C3                                |
| Q3MHN2              | CO9    | Complement component C9                      |
| Q3SYW2              | CO2    | Complement C2                                |
| Q3T0A3              | CFAD   | Complement factor D                          |
| Q5E9E3              | C1QA   | Complement C1q subcomponent subunit A        |
| <i>Lipoproteins</i> |        |                                              |
| P11151              | LIPL   | Lipoprotein lipase                           |
| P15497              | APOA1  | Apolipoprotein A-I                           |
| P17690              | APOH   | Beta-2-glycoprotein 1                        |
| P19034              | APOC2  | Apolipoprotein C-II                          |
| P19035              | APOC3  | Apolipoprotein C-III                         |
| P81644              | APOA2  | Apolipoprotein A-II                          |
| Q03247              | APOE   | Apolipoprotein E                             |
| Q2KJ93              | CDC42  | Cell division control protein 42 homolog     |
| Q32KY0              | APOD   | Apolipoprotein D                             |
| Q32PJ2              | APOA4  | Apolipoprotein A-IV                          |
| <i>Coagulation</i>  |        |                                              |
| P00741              | FA9    | Coagulation factor IX                        |
| P00743              | FA10   | Coagulation factor X                         |
| P00744              | PROZ   | Vitamin K-dependent protein Z                |
| P00745              | PROC   | Vitamin K-dependent protein C (Fragment)     |
| P01044              | KNG1   | Kininogen-1                                  |
| P01045              | KNG2   | Kininogen-2                                  |
| P06868              | PLMN   | Plasminogen                                  |
| P07224              | PROS   | Vitamin K-dependent protein S                |
| P12260              | F13A   | Coagulation factor XIII A chain (Fragment)   |

---

|        |       |                                  |
|--------|-------|----------------------------------|
| P12799 | FIBG  | Fibrinogen gamma-B chain         |
| P41361 | ANT3  | Antithrombin-III                 |
| P50448 | F12AI | Factor XIIa inhibitor            |
| P80012 | VWF   | von Willebrand factor (Fragment) |
| P98140 | FA12  | Coagulation factor XII           |
| Q2KIG3 | CBPB2 | Carboxypeptidase B2              |
| Q2KJ63 | KLKB1 | Plasma kallikrein                |
| Q5E9Z2 | HABP2 | Hyaluronan-binding protein 2     |
| Q5NTB3 | FA11  | Coagulation factor XI            |

---
